# Supplementary material for: Two conformers of a tyrosine kinase inhibitor (AG-1478) disclosed using simulated UV-Vis absorption spectroscopy
Source: Royal Society of Chemistry journal article supplement (doi:10.1039/c6nj01909a), 2016-01-01
Supplement: c6nj01909a1.pdf [file c6nj01909a1.pdf]

## Supplementary Materials

### Two Conformers of a Tyrosine Kinase Inhibitor (AG-1478) Disclosed Using Simulated UV-Vis Absorption Spectroscopy

Muhammad Khattab<sup>a</sup>, Subhojyoti Chatterjee<sup>b</sup>, Andrew H. A. Clayton<sup>a\*</sup>  
and Feng Wang<sup>b\*</sup>

<sup>a</sup>*Centre for Micro-Photonics, Faculty of Science, Engineering and Technology, Swinburne University of Technology, Melbourne, Victoria 3122, Australia*

<sup>b</sup>*Molecular Model Discovery Laboratory, Department of Chemistry and Biotechnology, School of Science, Faculty of Science, Engineering and Technology, Swinburne University of Technology, Melbourne, Victoria 3122, Australia*

\*Corresponding author: [fwang@swin.edu.au](mailto:fwang@swin.edu.au)  
[aclayton@swin.edu.au](mailto:aclayton@swin.edu.au)

**Table S1:** Molecular parameters of AG-1478 obtained by geometry reoptimization using the B3LYP/6-311+G\* model of the three local minimum structures of PES at 6-311G\*

| Parameters                                               | AG-1478B | AG-1478A | Parameters                                                                 | AG-1478B | AG-1478A |
|----------------------------------------------------------|----------|----------|----------------------------------------------------------------------------|----------|----------|
| <b>Bond length (Å)</b>                                   |          |          | <b>Bond angle (°)</b>                                                      |          |          |
| C <sub>(1)</sub> -C <sub>(2)</sub>                       | 1.3750   | 1.3748   | C <sub>(2)</sub> -C <sub>(1)</sub> -C <sub>(6)</sub>                       | 119.64   | 119.83   |
| C <sub>(1)</sub> -C <sub>(6)</sub>                       | 1.4365   | 1.4402   | C <sub>(2)</sub> -C <sub>(1)</sub> -O <sub>(27)</sub>                      | 125.31   | 125.23   |
| C <sub>(1)</sub> -O <sub>(27)</sub>                      | 1.3510   | 1.3498   | C <sub>(6)</sub> -C <sub>(1)</sub> -O <sub>(27)</sub>                      | 115.04   | 114.93   |
| C <sub>(2)</sub> -C <sub>(3)</sub>                       | 1.4166   | 1.4176   | C <sub>(1)</sub> -C <sub>(2)</sub> -C <sub>(3)</sub>                       | 121.16   | 120.95   |
| C <sub>(2)</sub> -H <sub>(7)</sub>                       | 1.0816   | 1.0815   | C <sub>(1)</sub> -C <sub>(2)</sub> -H <sub>(7)</sub>                       | 121.96   | 122.02   |
| C <sub>(3)</sub> -C <sub>(4)</sub>                       | 1.4163   | 1.4216   | C <sub>(3)</sub> -C <sub>(2)</sub> -H <sub>(7)</sub>                       | 116.88   | 117.02   |
| C <sub>(3)</sub> -N <sub>(13)</sub>                      | 1.3666   | 1.3627   | C <sub>(2)</sub> -C <sub>(3)</sub> -C <sub>(4)</sub>                       | 119.38   | 119.21   |
| C <sub>(4)</sub> -C <sub>(5)</sub>                       | 1.4208   | 1.4209   | C <sub>(2)</sub> -C <sub>(3)</sub> -N <sub>(13)</sub>                      | 118.26   | 118.51   |
| C <sub>(4)</sub> -C <sub>(8)</sub>                       | 1.4392   | 1.4269   | C <sub>(4)</sub> -C <sub>(3)</sub> -N <sub>(13)</sub>                      | 122.36   | 122.25   |
| C <sub>(5)</sub> -C <sub>(6)</sub>                       | 1.3766   | 1.3743   | C <sub>(3)</sub> -C <sub>(4)</sub> -C <sub>(5)</sub>                       | 118.96   | 119.23   |
| C <sub>(5)</sub> -H <sub>(9)</sub>                       | 1.0827   | 1.0795   | C <sub>(3)</sub> -C <sub>(4)</sub> -C <sub>(8)</sub>                       | 115.34   | 115.18   |
| C <sub>(6)</sub> -O <sub>(28)</sub>                      | 1.3555   | 1.3536   | C <sub>(5)</sub> -C <sub>(4)</sub> -C <sub>(8)</sub>                       | 125.71   | 125.54   |
| C <sub>(8)</sub> -N <sub>(12)</sub>                      | 1.3235   | 1.327    | C <sub>(4)</sub> -C <sub>(5)</sub> -C <sub>(6)</sub>                       | 121.12   | 120.82   |
| C <sub>(8)</sub> -N <sub>(25)</sub>                      | 1.3764   | 1.3928   | C <sub>(4)</sub> -C <sub>(5)</sub> -H <sub>(9)</sub>                       | 120.74   | 119.32   |
| C <sub>(10)</sub> -H <sub>(11)</sub>                     | 1.0870   | 1.0868   | C <sub>(6)</sub> -C <sub>(5)</sub> -H <sub>(9)</sub>                       | 118.14   | 119.85   |
| C <sub>(10)</sub> -N <sub>(12)</sub>                     | 1.3505   | 1.3479   | C <sub>(1)</sub> -C <sub>(6)</sub> -C <sub>(5)</sub>                       | 119.73   | 119.85   |
| C <sub>(10)</sub> -N <sub>(13)</sub>                     | 1.3101   | 1.3136   | C <sub>(1)</sub> -C <sub>(6)</sub> -O <sub>(28)</sub>                      | 114.89   | 114.82   |
| C <sub>(14)</sub> -C <sub>(15)</sub>                     | 1.406    | 1.4023   | C <sub>(5)</sub> -C <sub>(6)</sub> -O <sub>(28)</sub>                      | 125.38   | 125.32   |
| C <sub>(14)</sub> -C <sub>(16)</sub>                     | 1.4016   | 1.4005   | C <sub>(4)</sub> -C <sub>(8)</sub> -N <sub>(12)</sub>                      | 121.30   | 121.57   |
| C <sub>(14)</sub> -N <sub>(25)</sub>                     | 1.4059   | 1.4118   | C <sub>(4)</sub> -C <sub>(8)</sub> -N <sub>(25)</sub>                      | 119.13   | 123.66   |
| C <sub>(15)</sub> -C <sub>(17)</sub>                     | 1.3873   | 1.3896   | N <sub>(12)</sub> -C <sub>(8)</sub> -N <sub>(25)</sub>                     | 119.57   | 114.59   |
| C <sub>(15)</sub> -H <sub>(18)</sub>                     | 1.0869   | 1.0852   | H <sub>(11)</sub> -C <sub>(10)</sub> -N <sub>(12)</sub>                    | 115.17   | 115.51   |
| C <sub>(16)</sub> -C <sub>(19)</sub>                     | 1.3910   | 1.3904   | H <sub>(11)</sub> -C <sub>(10)</sub> -N <sub>(13)</sub>                    | 116.99   | 117.08   |
| C <sub>(16)</sub> -H <sub>(20)</sub>                     | 1.0776   | 1.0818   | N <sub>(12)</sub> -C <sub>(10)</sub> -N <sub>(13)</sub>                    | 127.84   | 127.4    |
| C <sub>(17)</sub> -C <sub>(21)</sub>                     | 1.3942   | 1.3945   | C <sub>(8)</sub> -N <sub>(12)</sub> -C <sub>(10)</sub>                     | 117.43   | 117.42   |
| C <sub>(17)</sub> -H <sub>(22)</sub>                     | 1.0849   | 1.085    | C <sub>(3)</sub> -N <sub>(13)</sub> -C <sub>(10)</sub>                     | 115.74   | 115.93   |
| C <sub>(19)</sub> -C <sub>(21)</sub>                     | 1.3894   | 1.3905   | C <sub>(15)</sub> -C <sub>(14)</sub> -C <sub>(16)</sub>                    | 119.14   | 119.27   |
| C <sub>(19)</sub> -Cl <sub>(24)</sub>                    | 1.7611   | 1.7602   | C <sub>(15)</sub> -C <sub>(14)</sub> -N <sub>(25)</sub>                    | 116.44   | 118.1    |
| C <sub>(21)</sub> -H <sub>(23)</sub>                     | 1.0827   | 1.0828   | C <sub>(16)</sub> -C <sub>(14)</sub> -N <sub>(25)</sub>                    | 124.42   | 122.6    |
| N <sub>(25)</sub> -H <sub>(26)</sub>                     | 1.0061   | 1.0126   | C <sub>(14)</sub> -C <sub>(15)</sub> -C <sub>(17)</sub>                    | 120.66   | 120.27   |
| O <sub>(27)</sub> -C <sub>(33)</sub>                     | 1.4231   | 1.4228   | C <sub>(14)</sub> -C <sub>(15)</sub> -H <sub>(18)</sub>                    | 119.80   | 119.39   |
| O <sub>(28)</sub> -C <sub>(29)</sub>                     | 1.4185   | 1.4214   | C <sub>(17)</sub> -C <sub>(15)</sub> -H <sub>(18)</sub>                    | 119.54   | 120.34   |
| C <sub>(29)</sub> -H <sub>(30)</sub>                     | 1.0881   | 1.0881   | C <sub>(14)</sub> -C <sub>(16)</sub> -C <sub>(19)</sub>                    | 118.69   | 119.21   |
| C <sub>(29)</sub> -H <sub>(31)</sub>                     | 1.0954   | 1.0943   | C <sub>(14)</sub> -C <sub>(16)</sub> -H <sub>(20)</sub>                    | 120.14   | 120.85   |
| C <sub>(29)</sub> -H <sub>(32)</sub>                     | 1.0954   | 1.0949   | C <sub>(19)</sub> -C <sub>(16)</sub> -H <sub>(20)</sub>                    | 121.18   | 119.93   |
| C <sub>(33)</sub> -H <sub>(34)</sub>                     | 1.0879   | 1.0879   | C <sub>(15)</sub> -C <sub>(17)</sub> -C <sub>(21)</sub>                    | 120.81   | 120.97   |
| C <sub>(33)</sub> -H <sub>(35)</sub>                     | 1.0941   | 1.0942   | C <sub>(15)</sub> -C <sub>(17)</sub> -H <sub>(22)</sub>                    | 119.54   | 119.56   |
| C <sub>(33)</sub> -H <sub>(36)</sub>                     | 1.0941   | 1.0942   | C <sub>(21)</sub> -C <sub>(17)</sub> -H <sub>(22)</sub>                    | 119.65   | 119.46   |
| <b>Bond angle (°)</b>                                    |          |          | <b>Dihedral angle (°)</b>                                                  |          |          |
| C <sub>(16)</sub> -C <sub>(19)</sub> -C <sub>(21)</sub>  | 122.86   | 122.15   | C <sub>(4)</sub> -C <sub>(8)</sub> -N <sub>(12)</sub> -C <sub>(10)</sub>   | 0.00     | -3.5     |
| C <sub>(16)</sub> -C <sub>(19)</sub> -Cl <sub>(24)</sub> | 118.23   | 118.62   | N <sub>(25)</sub> -C <sub>(8)</sub> -N <sub>(12)</sub> -C <sub>(10)</sub>  | 180.00   | -178.93  |
| C <sub>(21)</sub> -C <sub>(19)</sub> -Cl <sub>(24)</sub> | 118.91   | 119.22   | C <sub>(4)</sub> -C <sub>(8)</sub> -N <sub>(25)</sub> -C <sub>(14)</sub>   | -180.00  | 49.19    |
| C <sub>(17)</sub> -C <sub>(21)</sub> -C <sub>(19)</sub>  | 117.84   | 118.1    | C <sub>(4)</sub> -C <sub>(8)</sub> -N <sub>(25)</sub> -H <sub>(26)</sub>   | 0.02     | -163.46  |
| C <sub>(17)</sub> -C <sub>(21)</sub> -H <sub>(23)</sub>  | 121.40   | 121.34   | N <sub>(12)</sub> -C <sub>(8)</sub> -N <sub>(25)</sub> -C <sub>(14)</sub>  | 0.00     | -135.49  |
| C <sub>(19)</sub> -C <sub>(21)</sub> -H <sub>(23)</sub>  | 120.76   | 120.57   | N <sub>(12)</sub> -C <sub>(8)</sub> -N <sub>(25)</sub> -H <sub>(26)</sub>  | -179.97  | 11.86    |
| C <sub>(8)</sub> -N <sub>(25)</sub> -C <sub>(14)</sub>   | 131.92   | 128.12   | H <sub>(11)</sub> -C <sub>(10)</sub> -N <sub>(12)</sub> -C <sub>(8)</sub>  | 180.00   | 179.72   |
| C <sub>(8)</sub> -N <sub>(25)</sub> -H <sub>(26)</sub>   | 114.94   | 110.24   | N <sub>(13)</sub> -C <sub>(10)</sub> -N <sub>(12)</sub> -C <sub>(8)</sub>  | 0.00     | -1.46    |
| C <sub>(14)</sub> -N <sub>(25)</sub> -H <sub>(26)</sub>  | 113.14   | 114.08   | H <sub>(11)</sub> -C <sub>(10)</sub> -N <sub>(13)</sub> -C <sub>(3)</sub>  | -180.00  | -177.46  |
| C <sub>(1)</sub> -O <sub>(27)</sub> -C <sub>(33)</sub>   | 118.26   | 118.37   | N <sub>(12)</sub> -C <sub>(10)</sub> -N <sub>(13)</sub> -C <sub>(3)</sub>  | 0.01     | 3.73     |
| C <sub>(6)</sub> -O <sub>(28)</sub> -C <sub>(29)</sub>   | 118.66   | 118.38   | C <sub>(16)</sub> -C <sub>(14)</sub> -C <sub>(15)</sub> -C <sub>(17)</sub> | -0.01    | -0.14    |
| O <sub>(28)</sub> -C <sub>(29)</sub> -H <sub>(30)</sub>  | 105.76   | 105.65   | C <sub>(16)</sub> -C <sub>(14)</sub> -C <sub>(15)</sub> -H <sub>(18)</sub> | 179.99   | -179.61  |
| O <sub>(28)</sub> -C <sub>(29)</sub> -H <sub>(31)</sub>  | 111.36   | 111.27   | N <sub>(25)</sub> -C <sub>(14)</sub> -C <sub>(15)</sub> -C <sub>(17)</sub> | 179.99   | -178.25  |
| O <sub>(28)</sub> -C <sub>(29)</sub> -H <sub>(32)</sub>  | 111.36   | 111.27   | N <sub>(25)</sub> -C <sub>(14)</sub> -C <sub>(15)</sub> -H <sub>(18)</sub> | -0.02    | 2.28     |
| H <sub>(30)</sub> -C <sub>(29)</sub> -H <sub>(31)</sub>  | 109.29   | 109.54   | C <sub>(15)</sub> -C <sub>(14)</sub> -C <sub>(16)</sub> -C <sub>(19)</sub> | 0.00     | 1.34     |

**Dihedral angle (°)**

|                                                                          |         |         |                                                                             |            |            |
|--------------------------------------------------------------------------|---------|---------|-----------------------------------------------------------------------------|------------|------------|
| H <sub>(30)</sub> -C <sub>(29)</sub> -H <sub>(32)</sub>                  | 109.29  | 109.42  | C <sub>(15)</sub> -C <sub>(14)</sub> -C <sub>(16)</sub> -H <sub>(20)</sub>  | -179.99    | -177.95    |
| H <sub>(31)</sub> -C <sub>(29)</sub> -H <sub>(32)</sub>                  | 109.68  | 109.6   | N <sub>(25)</sub> -C <sub>(14)</sub> -C <sub>(16)</sub> -C <sub>(19)</sub>  | -179.99    | 179.36     |
| O <sub>(27)</sub> -C <sub>(33)</sub> -H <sub>(34)</sub>                  | 105.63  | 105.63  | N <sub>(25)</sub> -C <sub>(14)</sub> -C <sub>(16)</sub> -H <sub>(20)</sub>  | 0.02       | 0.07       |
| O <sub>(27)</sub> -C <sub>(33)</sub> -H <sub>(35)</sub>                  | 111.17  | 111.19  | C <sub>(15)</sub> -C <sub>(14)</sub> -N <sub>(25)</sub> -C <sub>(8)</sub>   | 179.94     | -167.44    |
| O <sub>(27)</sub> -C <sub>(33)</sub> -H <sub>(36)</sub>                  | 111.17  | 111.17  | C <sub>(15)</sub> -C <sub>(14)</sub> -N <sub>(25)</sub> -H <sub>(26)</sub>  | -0.08      | 46.23      |
| H <sub>(34)</sub> -C <sub>(33)</sub> -H <sub>(35)</sub>                  | 109.60  | 109.57  | C <sub>(16)</sub> -C <sub>(14)</sub> -N <sub>(25)</sub> -C <sub>(8)</sub>   | -0.07      | 14.52      |
| H <sub>(34)</sub> -C <sub>(33)</sub> -H <sub>(36)</sub>                  | 109.60  | 109.6   | C <sub>(16)</sub> -C <sub>(14)</sub> -N <sub>(25)</sub> -H <sub>(26)</sub>  | 179.91     | -131.82    |
| H <sub>(35)</sub> -C <sub>(33)</sub> -H <sub>(36)</sub>                  | 109.59  | 109.59  | C <sub>(14)</sub> -C <sub>(15)</sub> -C <sub>(17)</sub> -C <sub>(21)</sub>  | 0.00       | -1.05      |
| C <sub>(6)</sub> -C <sub>(1)</sub> -C <sub>(2)</sub> -C <sub>(3)</sub>   | 0.00    | 0.68    | C <sub>(14)</sub> -C <sub>(15)</sub> -C <sub>(17)</sub> -H <sub>(22)</sub>  | -180.00    | 179.8      |
| C <sub>(6)</sub> -C <sub>(1)</sub> -C <sub>(2)</sub> -H <sub>(7)</sub>   | -180.00 | -178.04 | H <sub>(18)</sub> -C <sub>(15)</sub> -C <sub>(17)</sub> -C <sub>(21)</sub>  | -179.99    | 178.41     |
| O <sub>(27)</sub> -C <sub>(1)</sub> -C <sub>(2)</sub> -C <sub>(3)</sub>  | 180.00  | 179.77  | H <sub>(18)</sub> -C <sub>(15)</sub> -C <sub>(17)</sub> -H <sub>(22)</sub>  | 0.00       | -0.74      |
| O <sub>(27)</sub> -C <sub>(1)</sub> -C <sub>(2)</sub> -C <sub>(7)</sub>  | 0.00    | 1.04    | C <sub>(14)</sub> -C <sub>(16)</sub> -C <sub>(19)</sub> -C <sub>(21)</sub>  | 0.00       | -1.4       |
| C <sub>(2)</sub> -C <sub>(1)</sub> -C <sub>(6)</sub> -C <sub>(5)</sub>   | 0.00    | -1.72   | C <sub>(14)</sub> -C <sub>(16)</sub> -C <sub>(19)</sub> -Cl <sub>(24)</sub> | 180.00     | 179.44     |
| C <sub>(2)</sub> -C <sub>(1)</sub> -C <sub>(6)</sub> -O <sub>(28)</sub>  | 180.00  | 178.03  | H <sub>(20)</sub> -C <sub>(16)</sub> -C <sub>(19)</sub> -C <sub>(21)</sub>  | 179.99     | 177.89     |
| O <sub>(27)</sub> -C <sub>(1)</sub> -C <sub>(6)</sub> -C <sub>(5)</sub>  | -180.00 | 179.1   | H <sub>(20)</sub> -C <sub>(16)</sub> -C <sub>(19)</sub> -Cl <sub>(24)</sub> | -0.01      | -1.26      |
| O <sub>(27)</sub> -C <sub>(1)</sub> -C <sub>(6)</sub> -O <sub>(28)</sub> | 0.00    | -1.15   | C <sub>(15)</sub> -C <sub>(17)</sub> -C <sub>(21)</sub> -C <sub>(19)</sub>  | 0.00       | 1.01       |
| C <sub>(2)</sub> -C <sub>(1)</sub> -O <sub>(27)</sub> -C <sub>(33)</sub> | 0.01    | 0.79    | C <sub>(15)</sub> -C <sub>(17)</sub> -C <sub>(21)</sub> -H <sub>(23)</sub>  | 180.00     | -179.16    |
| C <sub>(6)</sub> -C <sub>(1)</sub> -O <sub>(27)</sub> -C <sub>(33)</sub> | -179.99 | 179.91  | H <sub>(22)</sub> -C <sub>(17)</sub> -C <sub>(21)</sub> -C <sub>(19)</sub>  | -180.00    | -179.84    |
| C <sub>(1)</sub> -C <sub>(2)</sub> -C <sub>(3)</sub> -C <sub>(4)</sub>   | 0.00    | 2       | H <sub>(22)</sub> -C <sub>(17)</sub> -C <sub>(21)</sub> -H <sub>(23)</sub>  | 0.00       | -0.01      |
| C <sub>(1)</sub> -C <sub>(2)</sub> -C <sub>(3)</sub> -N <sub>(13)</sub>  | -179.99 | -176.02 | C <sub>(16)</sub> -C <sub>(19)</sub> -C <sub>(21)</sub> -C <sub>(17)</sub>  | 0.00       | 0.23       |
| H <sub>(7)</sub> -C <sub>(2)</sub> -C <sub>(3)</sub> -C <sub>(4)</sub>   | -180.00 | -179.22 | C <sub>(16)</sub> -C <sub>(19)</sub> -C <sub>(21)</sub> -H <sub>(23)</sub>  | 180.00     | -179.6     |
| H <sub>(7)</sub> -C <sub>(2)</sub> -C <sub>(3)</sub> -N <sub>(13)</sub>  | 0.00    | 2.77    | Cl <sub>(24)</sub> -C <sub>(19)</sub> -C <sub>(21)</sub> -C <sub>(17)</sub> | 180.00     | 179.38     |
| C <sub>(2)</sub> -C <sub>(3)</sub> -C <sub>(4)</sub> -C <sub>(5)</sub>   | -0.01   | -3.63   | Cl <sub>(24)</sub> -C <sub>(19)</sub> -C <sub>(21)</sub> -H <sub>(23)</sub> | 0.00       | -0.45      |
| C <sub>(2)</sub> -C <sub>(3)</sub> -C <sub>(4)</sub> -C <sub>(8)</sub>   | 180.00  | 178.89  | C <sub>(1)</sub> -O <sub>(27)</sub> -C <sub>(33)</sub> -H <sub>(34)</sub>   | 179.99     | 179.39     |
| N <sub>(13)</sub> -C <sub>(3)</sub> -C <sub>(4)</sub> -C <sub>(5)</sub>  | 179.99  | 174.3   | C <sub>(1)</sub> -O <sub>(27)</sub> -C <sub>(33)</sub> -H <sub>(35)</sub>   | -61.20     | -61.83     |
| N <sub>(13)</sub> -C <sub>(3)</sub> -C <sub>(4)</sub> -C <sub>(8)</sub>  | 0.00    | -3.18   | C <sub>(1)</sub> -O <sub>(27)</sub> -C <sub>(33)</sub> -H <sub>(36)</sub>   | 61.18      | 60.57      |
| C <sub>(2)</sub> -C <sub>(3)</sub> -N <sub>(13)</sub> -C <sub>(10)</sub> | 180.00  | 176.84  | C <sub>(6)</sub> -O <sub>(28)</sub> -C <sub>(29)</sub> -H <sub>(30)</sub>   | -179.99    | -178.94    |
| C <sub>(4)</sub> -C <sub>(3)</sub> -N <sub>(13)</sub> -C <sub>(10)</sub> | 0.00    | -1.11   | C <sub>(6)</sub> -O <sub>(28)</sub> -C <sub>(29)</sub> -H <sub>(31)</sub>   | -61.37     | -60.14     |
| C <sub>(3)</sub> -C <sub>(4)</sub> -C <sub>(5)</sub> -C <sub>(6)</sub>   | 0.00    | 2.64    | C <sub>(6)</sub> -O <sub>(28)</sub> -C <sub>(29)</sub> -H <sub>(32)</sub>   | 61.39      | 62.4       |
| C <sub>(3)</sub> -C <sub>(4)</sub> -C <sub>(5)</sub> -H <sub>(9)</sub>   | -179.99 | -176.65 |                                                                             |            |            |
| C <sub>(8)</sub> -C <sub>(4)</sub> -C <sub>(5)</sub> -C <sub>(6)</sub>   | -180.00 | 179.84  | <b>&lt;R<sup>2</sup>&gt; (a.u.)</b>                                         | 10395.1155 | 7611.6811  |
| C <sub>(8)</sub> -C <sub>(4)</sub> -C <sub>(5)</sub> -H <sub>(9)</sub>   | 0.01    | 0.55    | <b>μ (D)</b>                                                                | 5.8297     | 3.0792     |
| C <sub>(3)</sub> -C <sub>(4)</sub> -C <sub>(8)</sub> -N <sub>(12)</sub>  | 0.01    | 5.56    | <b>E<sub>h</sub> (a.u.)</b>                                                 | -1393.2768 | -1393.2744 |
| C <sub>(3)</sub> -C <sub>(4)</sub> -C <sub>(8)</sub> -N <sub>(25)</sub>  | -179.99 | -179.43 | <b>ZPE (kcal.mol<sup>-1</sup>)</b>                                          | 173.5149   | 173.5958   |
| C <sub>(5)</sub> -C <sub>(4)</sub> -C <sub>(8)</sub> -N <sub>(12)</sub>  | -179.99 | -171.74 | <b>E<sub>h</sub> + ZPE (a.u.)</b>                                           | -1393.0003 | -1392.9978 |
| C <sub>(5)</sub> -C <sub>(4)</sub> -C <sub>(8)</sub> -N <sub>(25)</sub>  | 0.01    | 3.27    | <b>HOMO-LUMO gap (eV)</b>                                                   | 4.25       | 4.26       |
| C <sub>(4)</sub> -C <sub>(5)</sub> -C <sub>(6)</sub> -C <sub>(1)</sub>   | 0.00    | 0.03    | <b>Rot. Const. (GHz) A</b>                                                  | 0.5882     | 0.3470     |
| C <sub>(4)</sub> -C <sub>(5)</sub> -C <sub>(6)</sub> -O <sub>(28)</sub>  | 180.00  | -179.69 | <b>B</b>                                                                    | 0.1126     | 0.1855     |
| H <sub>(9)</sub> -C <sub>(5)</sub> -C <sub>(6)</sub> -C <sub>(1)</sub>   | 179.99  | 179.31  | <b>C</b>                                                                    | 0.0946     | 0.1447     |
| H <sub>(9)</sub> -C <sub>(5)</sub> -C <sub>(6)</sub> -O <sub>(28)</sub>  | -0.01   | -0.41   |                                                                             |            |            |
| C <sub>(1)</sub> -C <sub>(6)</sub> -O <sub>(28)</sub> -C <sub>(29)</sub> | 180.00  | 179.08  |                                                                             |            |            |
| C <sub>(5)</sub> -C <sub>(6)</sub> -O <sub>(28)</sub> -C <sub>(29)</sub> | 0.00    | -1.18   |                                                                             |            |            |

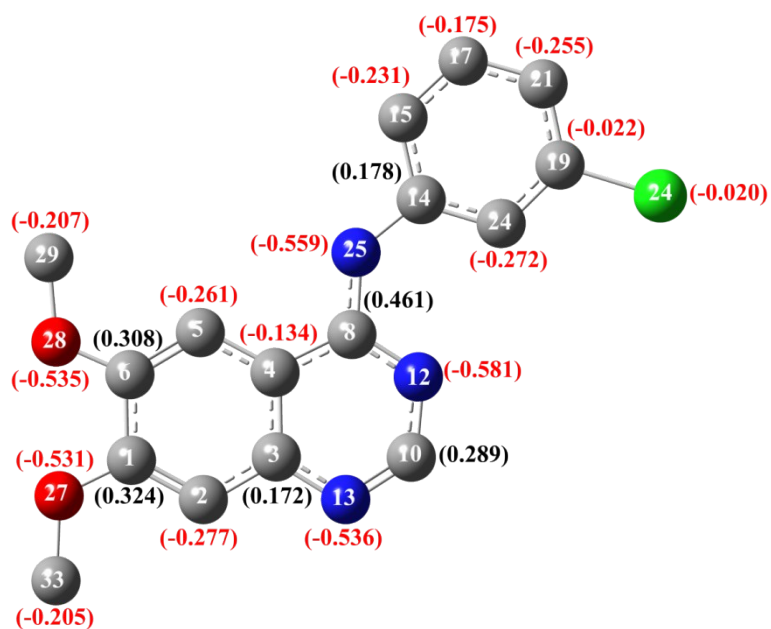

AG-1478B

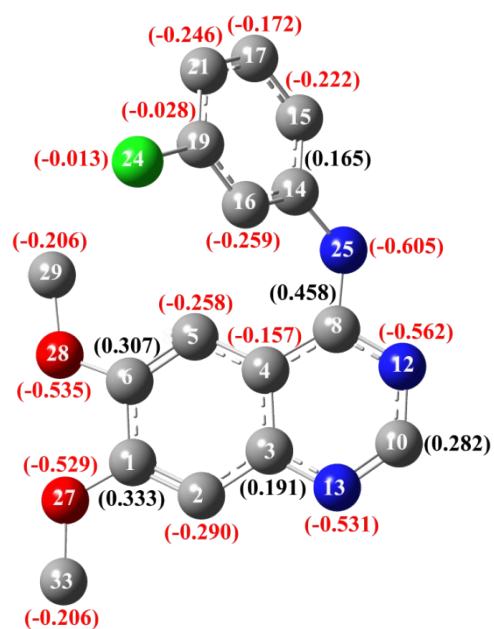

AG-1478A

**Figure S1:** Atomic charge analysis of heavy atoms of AG-1478B and AG-1478A using Natural Bond Order (NBO) analysis at the B3LYP/6-311+G\* level of theory.
